# Supplementary material
Source: publisher figshare collection journal article supplement (https://frontiersin.figshare.com/ndownloader/files/24106982)
Supplement: Supplementary file [file 24106982]

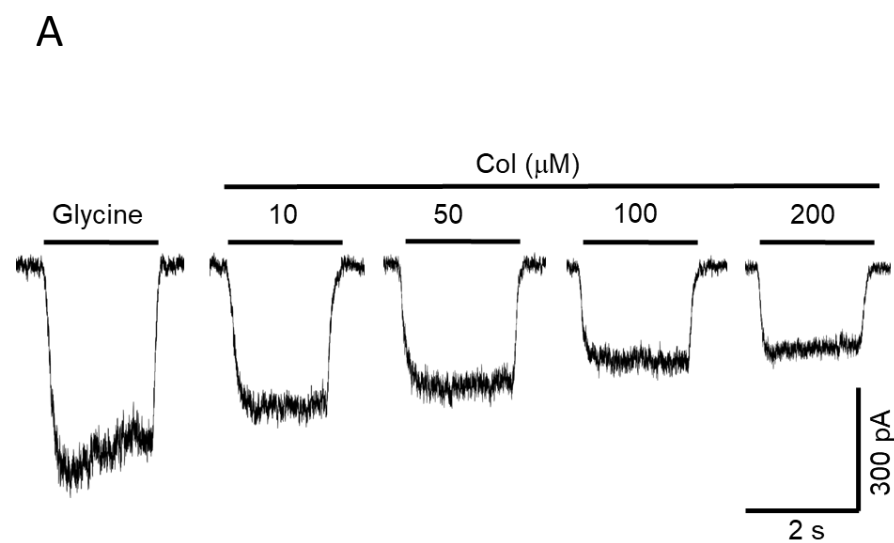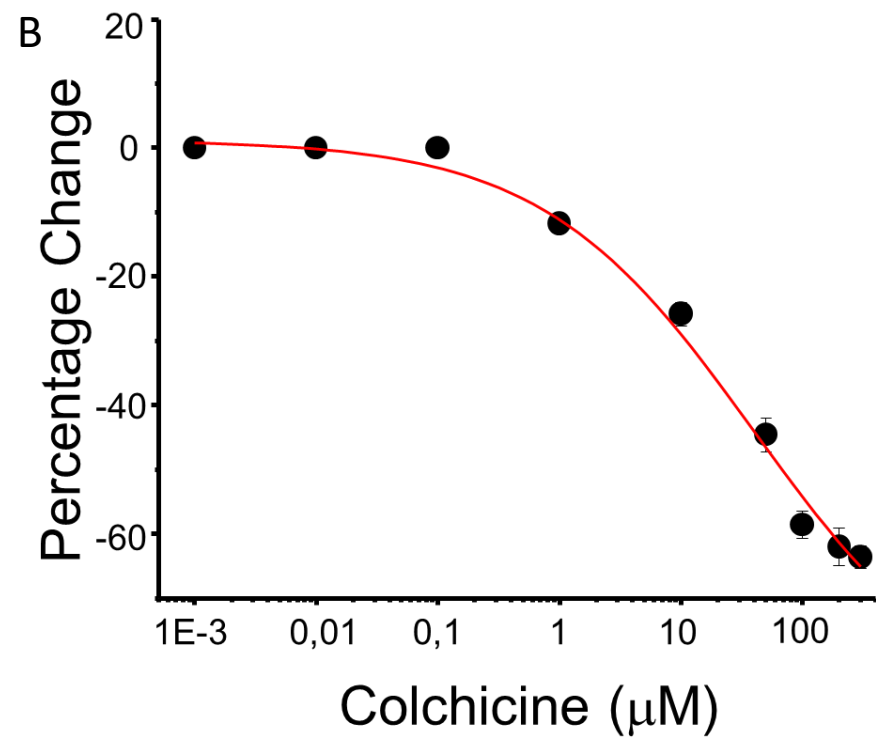

Figure S1

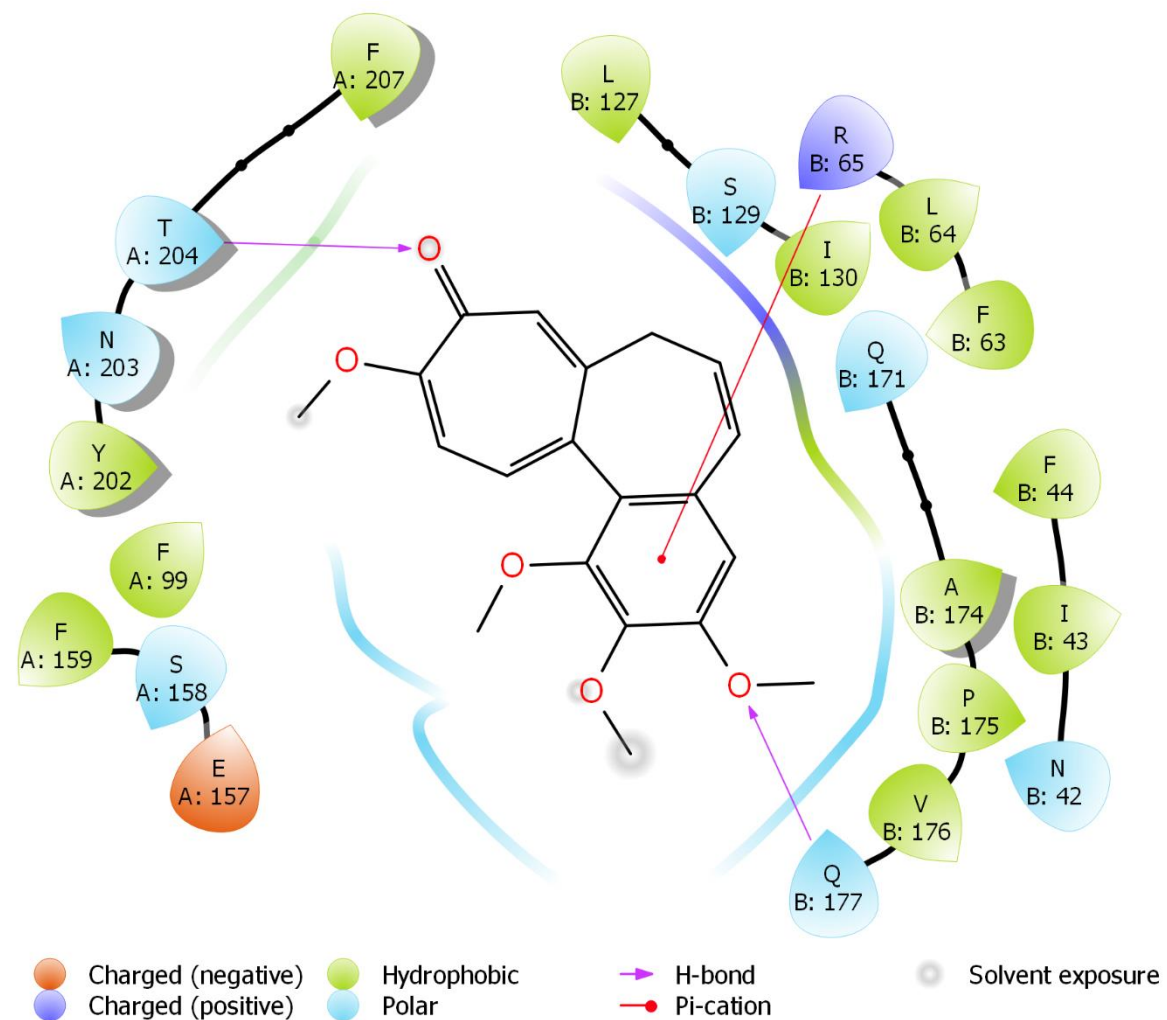

Figure S2
